# Supplementary material for: An In-Vitro Evaluation of the Characteristics of Zein-Based Films for the Release of Lactobionic Acid and the Effects of Oleic Acid
Source: MDPI journal article supplement (doi:10.3390/polym13111826), 2021-05-31
Supplement: s1 [file s1]

## Supporting Material

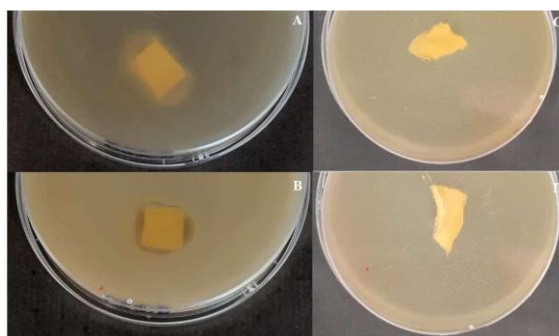

**Figure S1:** Agar-well diffusion assay for evaluation of antimicrobial activity of ZL and Zein films against *E. coli* (A: ZL film; C: Zein film) and *S. epidermidis* (B: ZL film; D: Zein film).

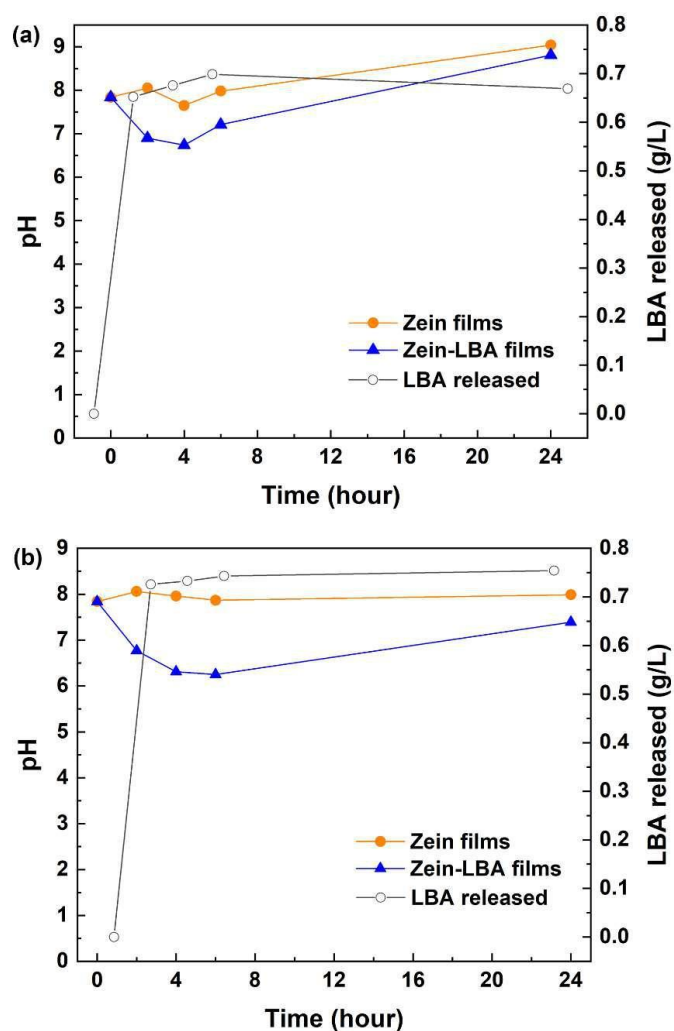

**Figure S2:** Antimicrobial activity assay: HPLC analysis and pH measurements performed on the growth medium for (a) *E. coli* and (b) *S. epidermidis*.
